# Supplementary material
Source: MDPI journal article supplement (https://www.mdpi.com/2073-4352/12/5/714)
Supplement: s1 [file s1]

## Supplementary Materials

# Crystalline Derivatives of Dipyrazolo-1,5-diazocine and Dipyrazolopyrimidine: A Case of Unexpected Synthesis and Isostructural Polymorphism

Fernando Cuenú-Cabezas <sup>1,\*</sup>, Rodrigo Abonia <sup>2</sup> and Jovanny A. Gómez Castaño <sup>3,\*</sup>

<sup>1</sup> Laboratorio de Química Inorgánica y Catálisis, Programa de Química, Universidad del Quindío, Carrera 15, Calle 12 Norte, Armenia 630004, Colombia

<sup>2</sup> Departamento de Química, Universidad del Valle, Calle 13 No. 100-00, A.A. 25360, Cali 76001, Colombia; rodrigo.abonia@correounivalle.edu.co

<sup>3</sup> Grupo Química-Física Molecular y Modelamiento Computacional (QUIMOL<sup>®</sup>), Facultad de Ciencias, Universidad Pedagógica y Tecnológica de Colombia (UPTC), Avenida Central del Norte, Tunja, Boyacá 050030, Colombia; grupo.quimol@uptc.edu.co

\* Correspondence: fercuenu@uniquindio.edu.co (F.C.-C.); jovanny.gomez@uptc.edu.co (J.A.G.C.)

CCitation: Cuenú-Cabezas, F.; Abonia, R.; Gómez Castaño, J.A. Crystalline Derivatives of Dipyrazolo-1,5-diazocine and Dipyrazolopyrimidine: A Case of Unexpected Synthesis and Isostructural Polymorphism. *Crystals* **2022**, *12*, 714. <https://doi.org/10.3390/cryst12050714>

Academic Editor: Neil Champness and Younes Hanifehpour

Received: 30 April 2022

Accepted: 14 May 2022

Published: 17 May 2022

**Publisher's Note:** MDPI stays neutral with regard to jurisdictional claims in published maps and institutional affiliations.

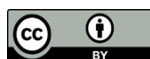

**Copyright:** © 2022 by the authors. Submitted for possible open access publication under the terms and conditions of the Creative Commons Attribution (CC BY) license (<https://creativecommons.org/licenses/by/4.0/>).

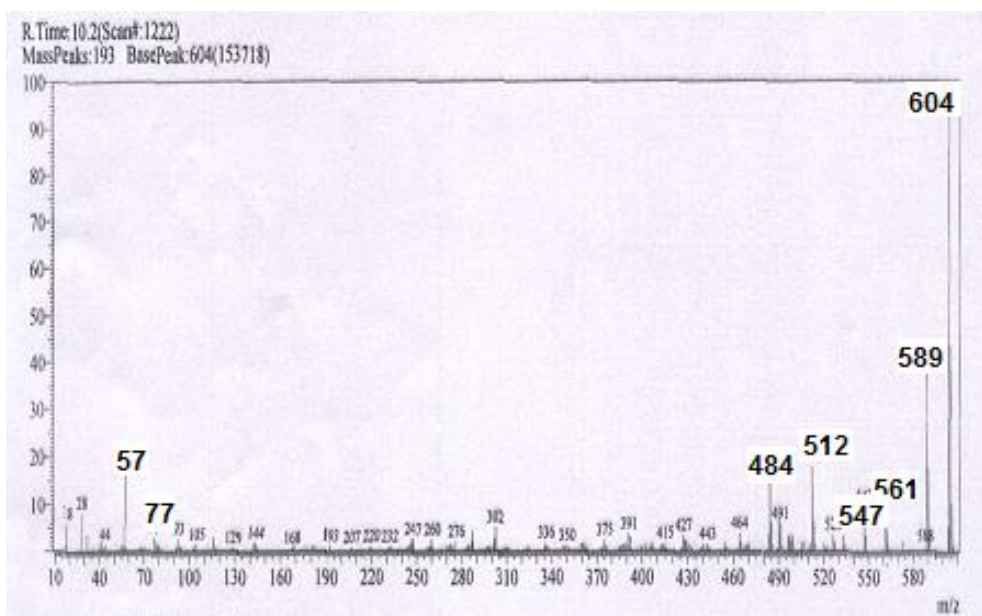

Figure S1. Electron-impact mass fragmentation spectrum of Dipyrzolo-1,5-diazocine derivative (8).

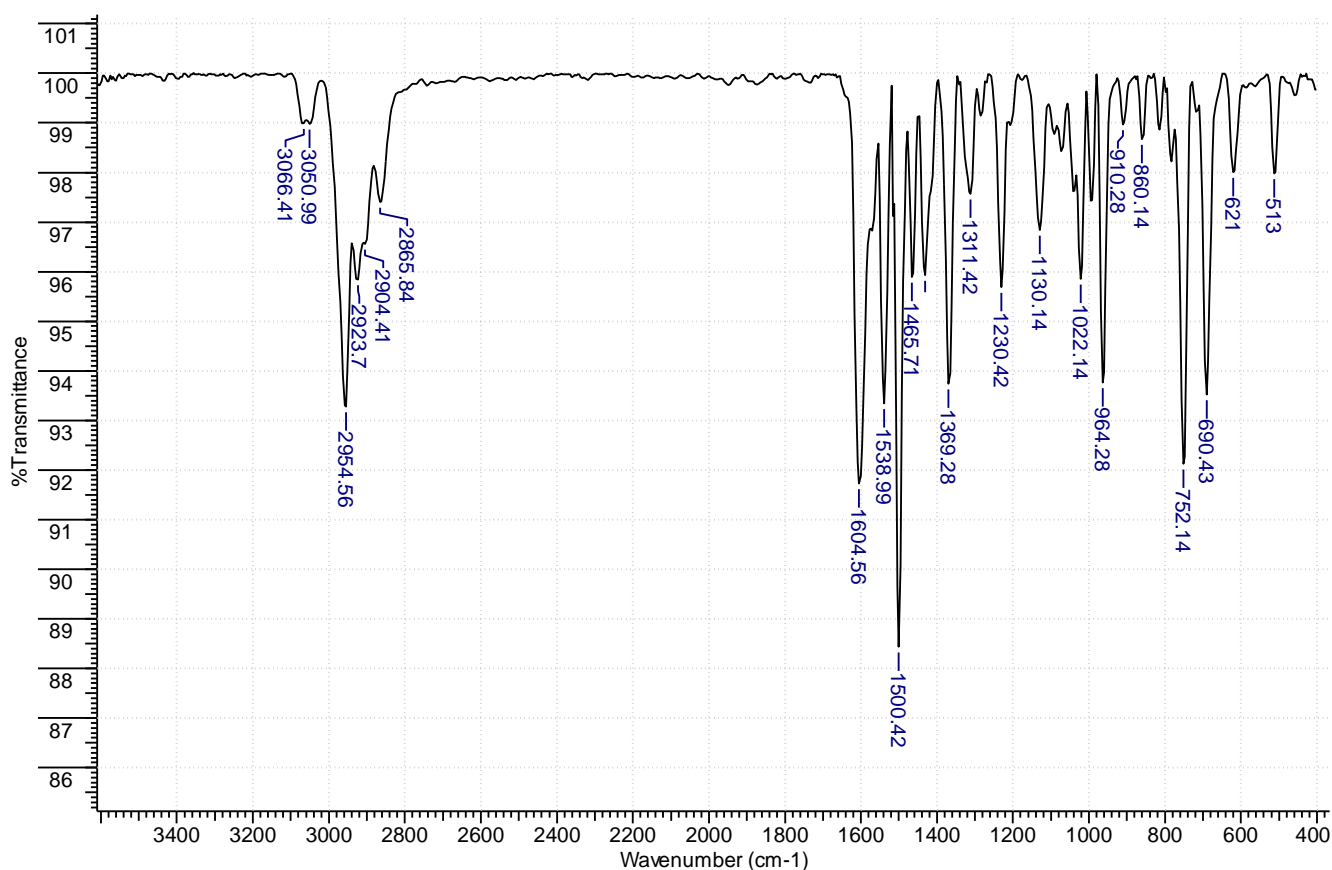

Figure S2. FTIR spectrum of the dipyrzolo-1,5-diazocine derivative (8) measured using the KBr disk technique.

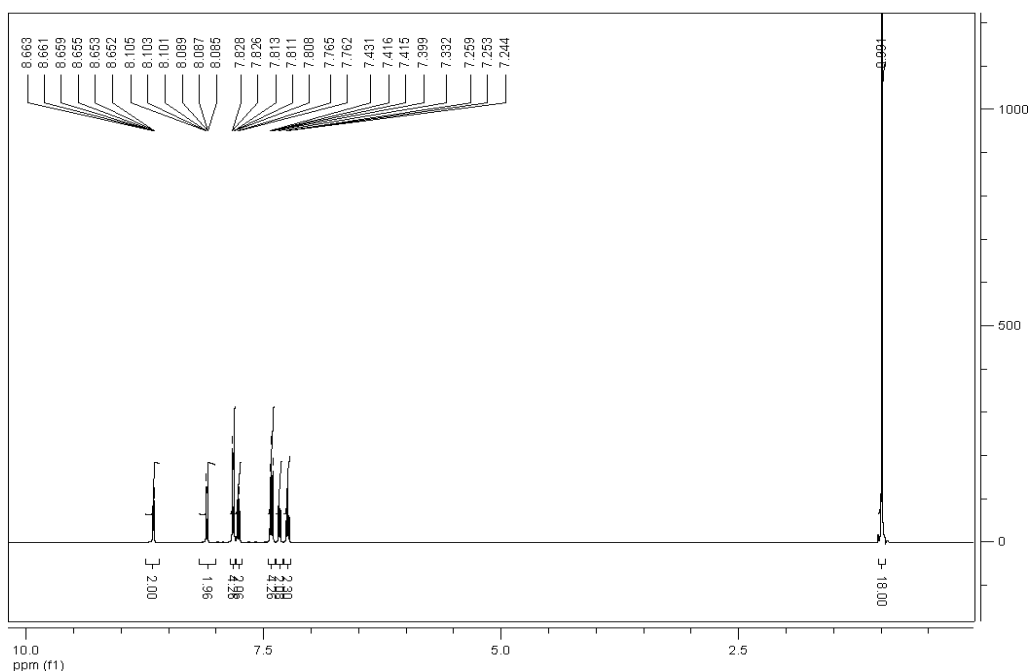

Figure S3. <sup>1</sup>H 1D-NMR spectrum of dipyrazolo-1,5-diazocine derivative (8) in deuterated chloroform.

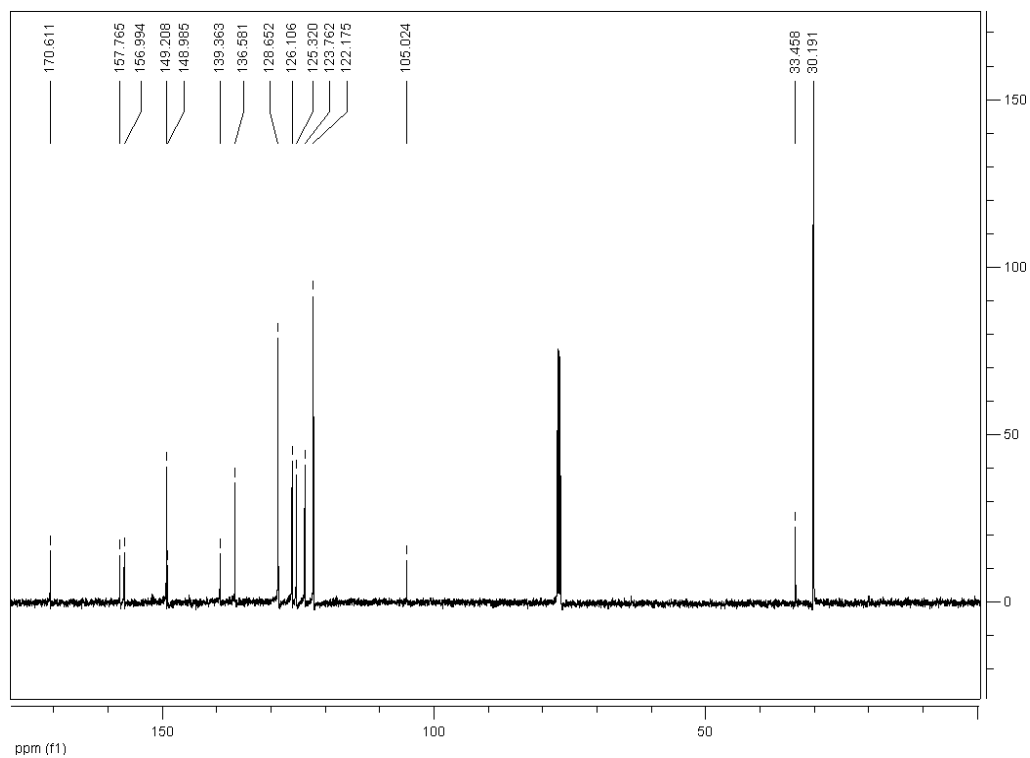

Figure S4. <sup>13</sup>C 1D-NMR spectrum of dipyrazolo-1,5-diazocine derivative (8) in deuterated chloroform.

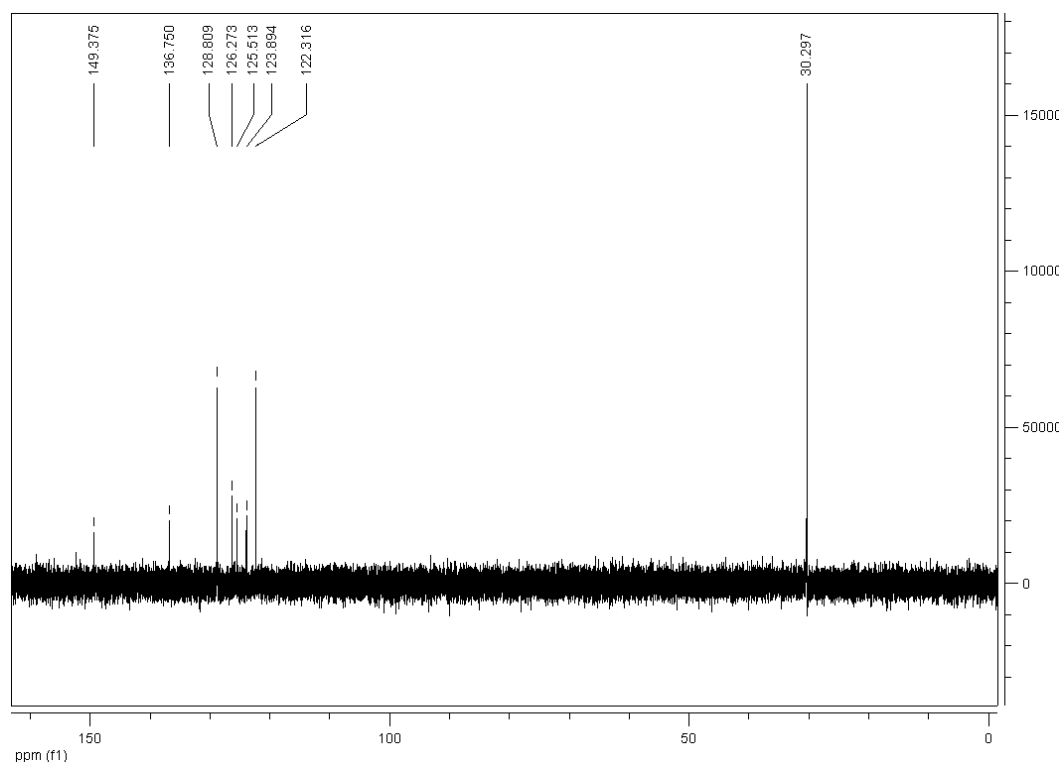

Figure S5. DEPT NMR spectrum of dipyrzolo-1,5-diazocine derivative (8) in deuterated chloroform.

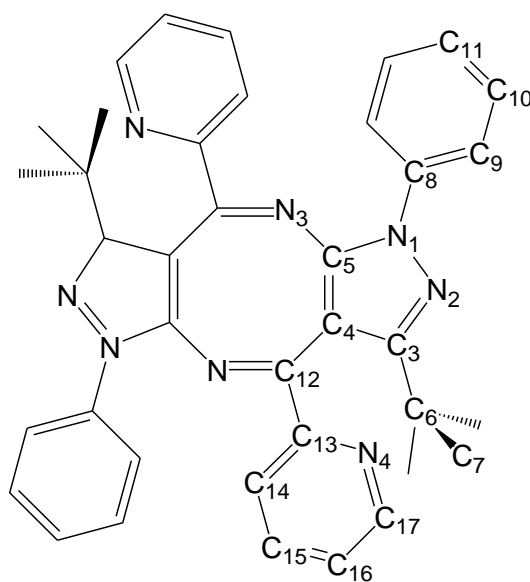

Figure S6. 2D-molecular representation of dipyrzolo-1,5-diazocine derivative (8) showing atomic numbering used for NMR assignments.

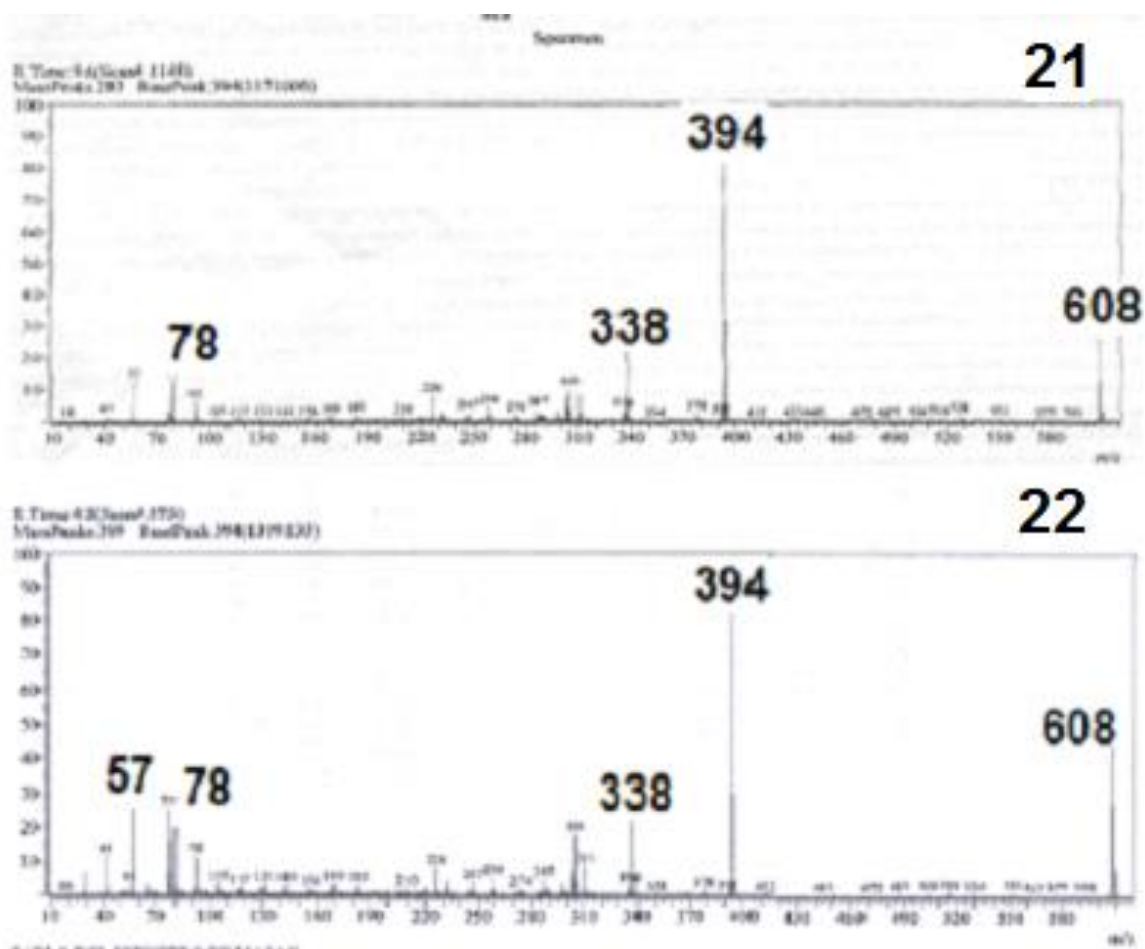

**Figure S7.** Electron-impact mass fragmentation impact of dipyrzolopyrimidine derivative (9). Polymorph 9a (top) and polymorph 9b (bottom).

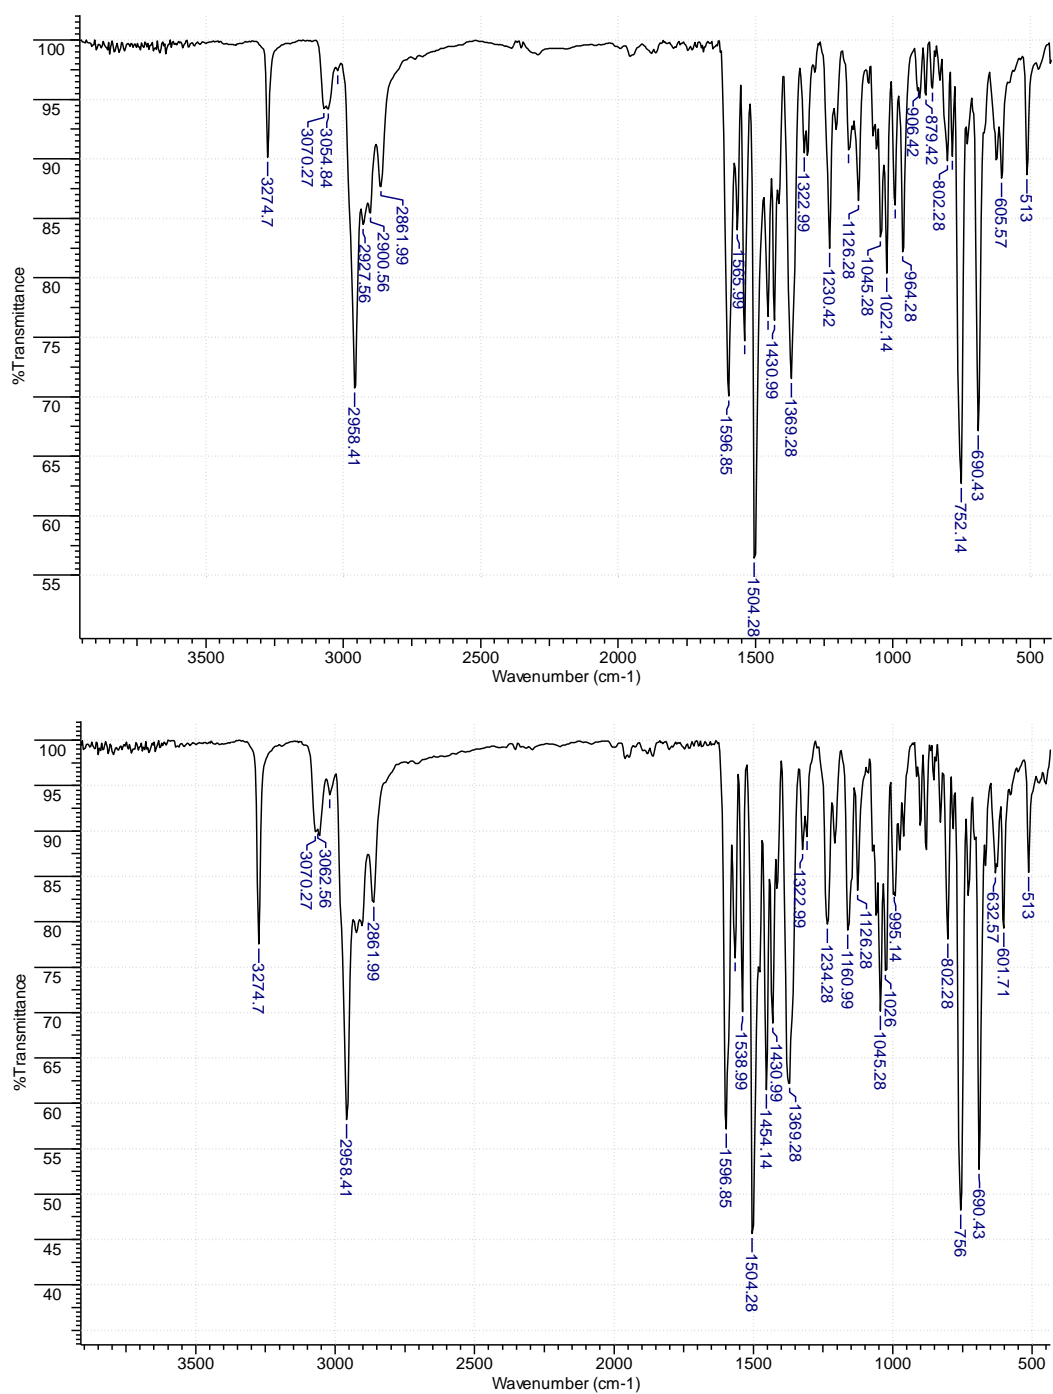

**Figure S8.** FTIR spectrum of dipyrzolopyrimidine derivative (9) measured using the KBr disk technique. Polymorph 9a (top) and polymorph 9b (bottom).

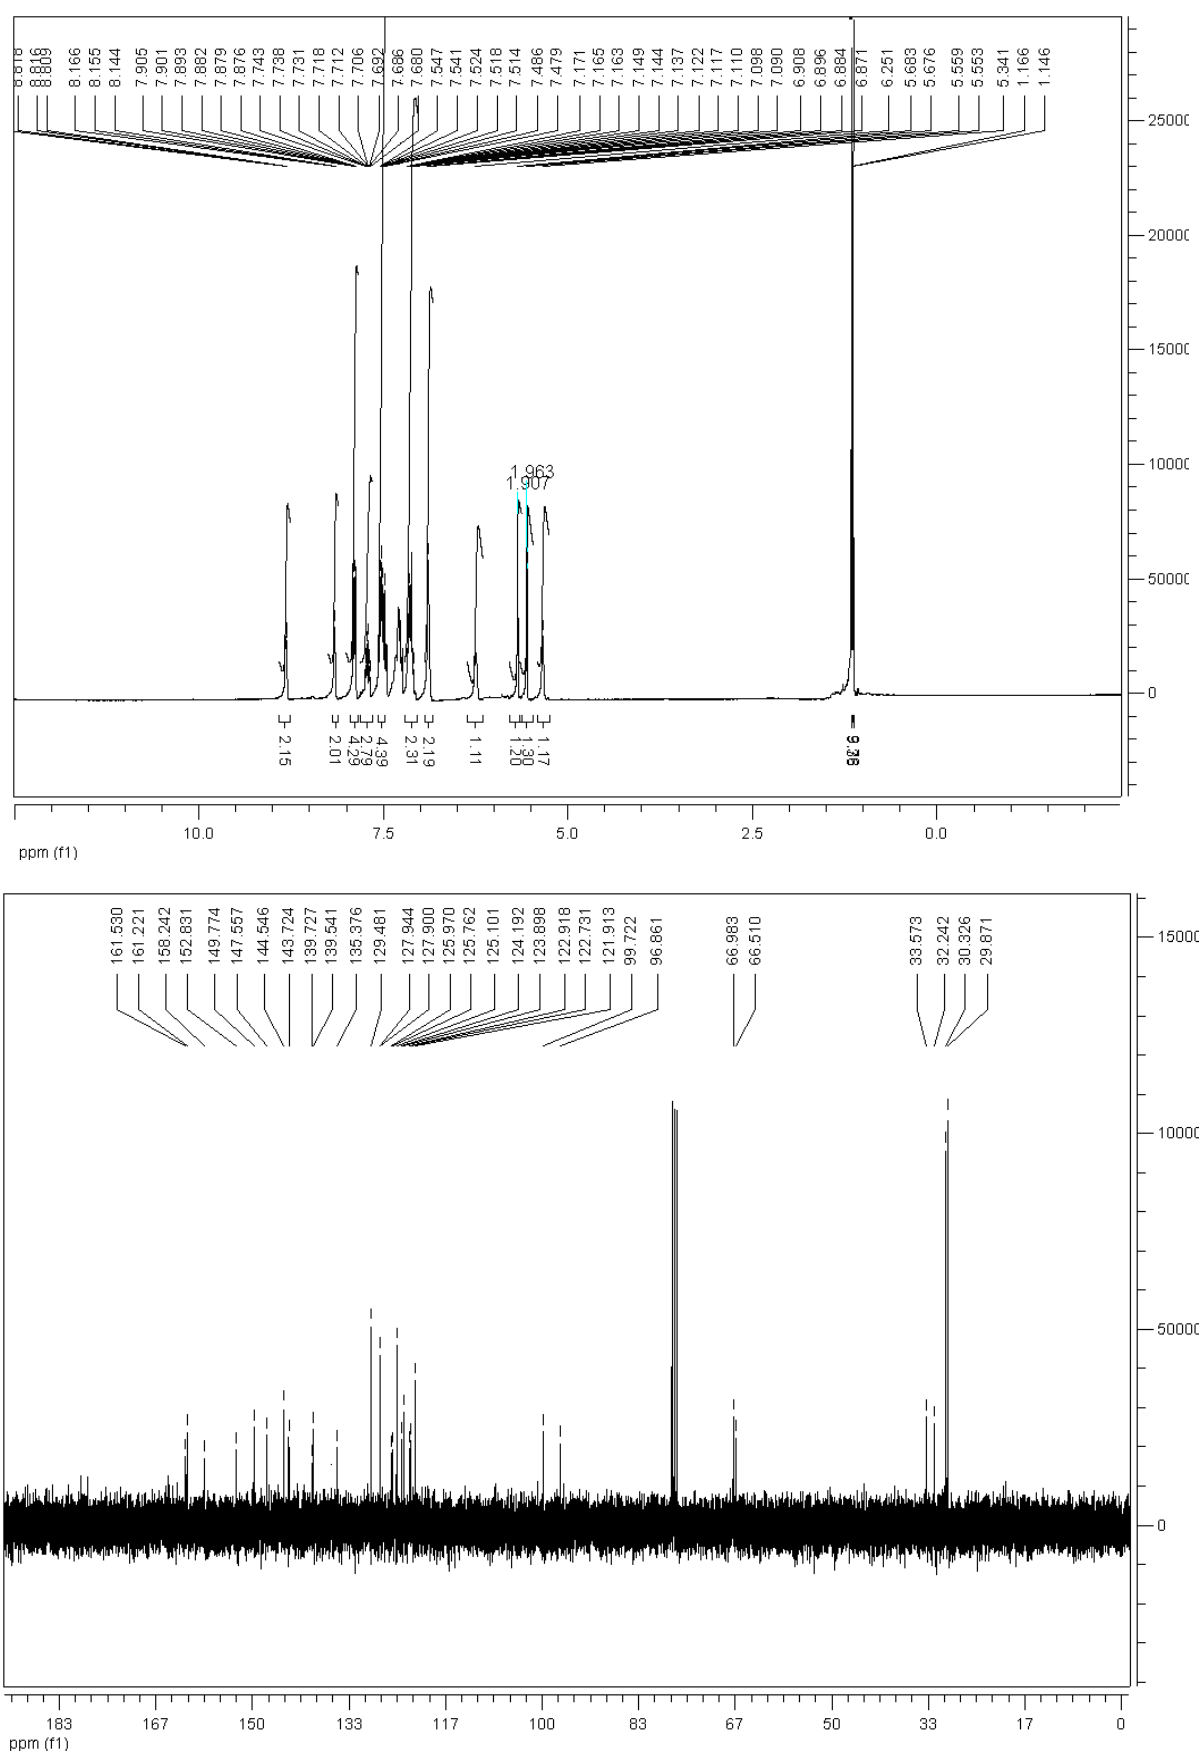

**Figure S9.** <sup>1</sup>H (top) and <sup>13</sup>C (bottom) 1D-NMR spectra of dipyrazolopyrimidine derivative (**9**) in deuterated chloroform. These NMR spectra corresponds to polymorph **9a**.
